# Supplementary material
Source: HighWire-hosted journal article supplement (https://thorax.bmj.com/content/75/11/918)
Supplement: inline-supplementary-material-1 [file inline-supplementary-material-1.pdf]

## Online Supplementary Data

### **Induction of ferroptosis-like cell death of eosinophils exerts synergistic effects with glucocorticoids in allergic airway inflammation**

Yanping Wu,<sup>1#</sup> Haixia Chen,<sup>1#</sup> Nanxia Xuan,<sup>1</sup> Lingren Zhou,<sup>1</sup> Yinfang Wu,<sup>1</sup> Chen Zhu,<sup>1</sup> Miao Li,<sup>1</sup> Qingyu Weng,<sup>1</sup> Jiaxin Shen,<sup>1</sup> Hao Zhang,<sup>1</sup> Bin Zhang,<sup>1</sup> Fen Lan,<sup>1</sup> Lixia Xia,<sup>1</sup> Xuefang Xiong,<sup>2</sup> Zhouyang Li,<sup>1</sup> Yun Zhao,<sup>1</sup> Mindan Wu,<sup>1</sup> Songmin Ying,<sup>1</sup> Wen Li,<sup>1\*</sup> Huahao Shen,<sup>1,3\*</sup> Zhihua Chen,<sup>1\*</sup>

<sup>1</sup> Key Laboratory of Respiratory Disease of Zhejiang Province, Department of Respiratory and Critical Care Medicine, Second Affiliated Hospital of Zhejiang University School of Medicine, Hangzhou, Zhejiang, 310009, China.

<sup>2</sup> Department of Respiratory Medicine, the Central Hospital of Lishui City, Lishui, Zhejiang, 323001, China.

<sup>3</sup> State Key Lab for Respiratory Diseases, National Clinical Research Centre for Respiratory Disease, Guangzhou, Guangdong, 510120, China.

## Supplementary materials and methods

### *Reagents*

Erastin, Ras-selective lethal small molecule 3 (RSL3), staurosporine, Z-VAD-FMK, spautin-1 and necrostatin-1 were purchased from Selleckchem (Houston, TX, USA). Artesunate (ART) was obtained from J&K (Beijing, China). Dexamethasone (DXMS) was obtained from the Second Affiliated Hospital of Zhejiang University (Hangzhou, China). Hydrogen peroxide (H<sub>2</sub>O<sub>2</sub>) solution was obtained from Aladdin (Shanghai, China). Deferoxamine (DFO), ferrostatin-1 (fer-1), lipoxstatin-1 (lip-1), ferrous sulfate and MitoTEMPO were obtained from Sigma-Aldrich (St. Louis, MO, USA). Ciclopirox olamine (CPX) was purchased from MedChemExpress (Monmouth Junction, NJ, USA). N-acetylcysteine (NAC) and glutathione (GSH) were obtained from Beyotime (Shanghai, China). Recombinant human and mouse interleukin (IL)5 were obtained from PeproTech (Rocky Hill, NJ, USA). Antibody specific to glutathione peroxidase 4 (GPX4) was purchased from Abcam (Cambridge, MA, USA). Antibody specific to actin beta (ACTB) was purchased from Santa Cruz Biotechnology (Santa Cruz, CA, USA). Goat anti-rabbit and anti-mouse secondary antibodies were from EarthOx (Millbrae, CA, USA). Primers for *Il4*, *Il13*, *Il25* and *Actb* were synthesized by Sangon Biotech (Shanghai, China).

### *Cell line and media*

Mouse embryonic fibroblasts (MEFs) were obtained from ATCC (Manassas, VA, USA) and grown in DMEM with 10% foetal bovine serum (FBS). MEFs were cultured in culture incubators at 37°C with 5% CO<sub>2</sub>, supplemented with penicillin and streptomycin.

### ***Peripheral blood collection from patients***

We recruited nine hypereosinophilic patients (three non-asthmatic and six asthmatic patients) from the clinical population at the Department of Respiratory and Critical Care Medicine of the Second Affiliated Hospital of Zhejiang University School of Medicine. Asthmatic patients were included if they met the criteria for asthma according to the Global Initiative for Asthma guidelines. All human subjects were from the Chinese Han population. This study was approved by the Ethics Committee of the Second Affiliated Hospital of Zhejiang University School of Medicine, and all patients provided written informed consent and understood that their samples would be used for research.

Leukocytes were obtained by lysis of erythrocytes from the peripheral blood of all the enrolled patients. Peripheral eosinophils were purified from four of the six asthmatic patients using negative immunomagnetic bead selection as previously described.<sup>1</sup> The purity of peripheral eosinophils was regularly greater than 98%. Purified eosinophils and leukocytes were then seeded in 24-well plates with RPMI 1640, 15% FBS and 50 ng/mL human IL5.

### ***Experimental animals***

Male C57BL/6 mice (wild-type, 6 to 8 weeks old) were purchased from Shanghai SLAC Laboratory Animal Co., Ltd. (Shanghai, China). Mice from each litter were randomized to different groups and housed for at least one week before initiation of the experiments. *Cd3δ* promoter *Il5* transgenic (Tg) mice were a generous gift from Professor James J Lee

(Department of Biochemistry and Molecular Biology, Mayo Clinic, USA). All mice were fed standard mouse chow and provided water. The room temperature was controlled at 20-22°C. Protocols were approved by the Ethics Committee for Animal Studies at Zhejiang University, China.

### ***Allergic animal models and treatments***

Mice for allergic model were sensitized intraperitoneally with 20 µg of chicken ovalbumin (OVA) (Sigma-Aldrich) emulsified in Imject alum (2.25 mg of Al(OH)<sub>3</sub>/2 mg of Mg(OH)<sub>2</sub>; Thermo Fisher Scientific, Waltham, MA, USA) in a total volume of 0.2 mL on days 0 and 14. On days 24, 25 and 26, mice were challenged with an aerosol of 1.5% OVA in sterile normal saline (NS) for approximately 40 minutes by means of ultrasonic nebulization (DeVilbiss, Somerset, PA, USA). The control mice were sensitized and challenged with the equal volume of NS.

Erastin (25 mg/kg) and RSL3 (10 mg/kg) were dissolved in dimethyl sulfoxide (DMSO) and administered intraperitoneally 2 hours after each OVA challenge. The controls were received equal dosage of DMSO for erastin or RSL3 group. ART (10 or 20 mg/kg) was dissolved in NS and delivered intraperitoneally once a day for 3 days before the first challenge, and 2 hours after each challenge. DXMS (0.25 or 0.5 mg/kg) was diluted in NS and administered intraperitoneally 2 hours after each challenge. In ART/DXMS groups, mice were injected with ART (10 mg/kg) alone once a day for 3 days before the first challenge, and then co-treated with ART (10 mg/kg) and DXMS (0.25 mg/kg) 2 hours after each challenge. Control mice were received the same volume of NS for ART, DXMS or

ART/DXMS group. Twenty-four hours after the last administration, all mice were sacrificed for analysis.

### ***Bronchoalveolar lavage and lung histology***

Mice were anaesthetized with 2% pentobarbital sodium, and the left lungs were lavaged three times with 0.4 mL of ice-cold phosphate buffer saline (PBS). The total bronchoalveolar lavage (BAL) cells were counted, and the rest of the bronchoalveolar lavage fluid (BALF) was centrifuged at 400 ×g for 15 minutes at 4°C. The cell pellet was suspended in 200 µL of PBS and stained with Wright-Giemsa stain (Baso, Guangdong, China). An analysis of differentiated cell counts in the BALF was performed by counting 200 total cells. Total protein concentration in BAL samples was quantified with a Pierce BCA-200 Protein Assay Kit (Thermo Fisher Scientific) according to the manufacturer's instructions.

After lavage, the left lungs were collected, fixed in 4% paraformaldehyde for more than 24 hours, and embedded in paraffin. Serial sections (5 mm) were sliced for haematoxylin and eosin (H&E) and periodic acid-schiff (PAS) staining. The inflammation score was assessed on a subjective scale of 0-3 based on published guidelines.<sup>2</sup> PAS-stained goblet cells in airway epithelium were scored using a numerical scoring system as described previously.<sup>3</sup>

### ***Primary mouse BAL eosinophil culture***

To harvest BAL eosinophils, allergic mice were anaesthetized, and BAL cells were

obtained with 0.8 mL of sterile PBS three times and cultured in 24-well plates with RPMI 1640 (10% FBS) at a density of  $0.25 \times 10^6$  cell/well for 24 hours.

### ***Primary mouse eosinophil isolation***

Blood was collected from *I15* Tg mice and separated by density centrifugation using Percoll (GE Healthcare, Little Chalfont, Buckinghamshire, UK) per the manufacturer's protocol, after which eosinophils were purified via negative selection with anti-CD4, anti-B220, anti-TER-199, and anti-CD8a-linked magnetic beads (BioLegend, San Diego, CA, USA). Purity (>99%) and viability (>99%) were confirmed by flow cytometric analysis. Eosinophils were grown in RPMI 1640 medium with 10% FBS and 10 ng/mL mouse IL5.

### ***Flow cytometric analysis***

The collected mouse BAL cells or blood leukocytes from patients were centrifuged at 400 ×g for 5 minutes at 4°C and resuspended in 50 µL of PBS. BAL cells were stained with anti-CD11c (APC; BD PharMingen, San Diego, CA, USA) and anti-Siglec-F (PE; eBioscience, San Diego, CA, USA). Blood leukocytes were stained with the following fluorescent dye-conjugated human antibodies: anti-CD45 (PE/Cy7; BioLegend), anti-Siglec-8 (APC; BioLegend) and anti-CCR3 (PE; eBioscience). All the samples were protected from light for 30 minutes at 4°C. Mouse BAL eosinophils were defined as Siglec-F<sup>+</sup>/CD11c<sup>-</sup> cells. Human peripheral eosinophils were confirmed as Siglec-8<sup>+</sup>/CCR3<sup>+</sup> cells. Isotype controls were used to define the gates.

Annexin V (FITC; MultiSciences, Hangzhou, China) and propidium iodide (PI) (PE;

MultiSciences) or 4',6-diamidino-2-phenylindole (DAPI) (MultiSciences) were used to assess the viability of cells. Double negative cells, annexin V/PI<sup>-</sup> or annexin V/DAPI<sup>-</sup>, were distinguished as viable cells. In the results of *in vitro* studies, cell viability was reported as a percentage relative to the control group which was considered as 100% of viability. In the results of *in vivo* studies, cell viability was shown as a percentage of annexin V/DAPI<sup>-</sup> eosinophils to the total number of BAL eosinophils. Data were acquired with a FACSCalibur flow cytometer (Cytoflex; Beckman Coulter, Miami, FL, USA) and analysed with FlowJo software (version 10; TreeStar, Ashland, OR, USA).

#### ***Analysis of reactive oxygen species (ROS)***

Eosinophils were cultured in 12-well plates at  $0.5 \times 10^6$  cells/well and treated with reagents. According to the manufacturer's instructions, after washing and resuspension, H<sub>2</sub>DCFDA (5 μM), C11-BODIPY (581/591) (10 μM) or MitoSOX (5 μM) (all from Molecular Probes, Invitrogen, Carlsbad, CA, USA) was added to analyse the level of ROS. Cells were incubated for 30 minutes at 37°C and then washed in serum-free medium three times. Data were acquired with a FACSCalibur flow cytometer.

#### ***Transmission electron microscopy***

Eosinophils from *I15* Tg mice or BAL cells from allergic mice were fixed with 2.5% glutaraldehyde for 1 hour at room temperature and then at 4°C overnight. The samples were washed with PBS three times, treated with 1% osmium tetroxide in PBS for 1.5 hours and then stained with 2% uranyl acetate. After dehydration in an ascending ethanol series,

cells were embedded in embedding medium. Sections were stained with 1% uranyl acetate and 0.4% lead citrate, and photographed using transmission electron microscopy (TEM, Tecnai G2 Spirit 120 kV) at the Centre of Cyro-Electron microscopy, Zhejiang University.

### ***Iron assay***

An iron assay (Sigma-Aldrich) was used to detect the concentration of ferrous iron. The principle was as follows: A colorimetric (593 nm) product was produced by the reaction between iron and a chromagen, proportional to the iron present. Briefly,  $2 \times 10^7$  cells were rapidly homogenized in 100  $\mu$ L of iron assay buffer and centrifuged at 16,000  $\times$ g for 10 minutes at 4°C. The supernatant was added to 96-well plates, brought to a volume of 100  $\mu$ L, and incubated for 30 minutes at 25°C. Then, each well was mixed with 100  $\mu$ L of an iron probe and incubated for 60 minutes in the dark. The absorbance at 593 nm was measured. The results were normalized to the cell total protein content according to the manufacturer's instructions.

### ***GSH assay***

Total GSH was determined by colorimetric microplate assay kits (Beyotime). In short, the collected cells were deproteinated and disrupted by repeated freeze-thawing. After centrifugation for 10 minutes (10,000  $\times$ g at 4°C), supernatants were added to a 96-well plate, and the protocol strictly complied with the manufacturer's instructions. The absorbance at 412 nm was measured and used to calculate the content of GSH, since 5,5'-dithio-bis (2-nitrobenzoic acid) (DTNB) and GSH react to generate yellow



2-nitro-5-thiobenzoic acid. The data were normalized against the total protein level of the cells.

### ***Western blot assay***

Eosinophils were treated with different compounds and lysed in SDS-PAGE sample loading buffer supplemented with a protease inhibitor cocktail. Sonicated and denatured proteins were separated on SDS-PAGE gels and then transferred onto polyvinylidene difluoride membranes (Merck Millipore, Billerica, MA, USA). The membranes were immunoblotted with the relevant antibodies and probed with secondary antibodies. The blots were then visualized using a western blot detection system (Odyssey; Li-COR Bioscience, Lincoln, NE, USA). ACTB served as an internal control.

### ***RNA isolation and reverse transcription quantitative PCR (qPCR)***

Total RNA was extracted from tissues using TRIzol (Invitrogen). Reverse transcription was performed with reverse transcription reagents (Takara, Tokyo, Japan). The expression of mouse *Il4*, *Il13* and *Il25* was measured by Real-time qPCR on a StepOnePlus PCR system (Applied Biosystems, Foster City, CA, USA). All protocols were performed strictly according to the manufacturer's instructions. Data were calculated using the  $2^{-\Delta\Delta Ct}$  method and normalized to *Actb* expression. The primers shown in supplementary table 1 were used to quantify mRNA levels.

### ***Statistics***

All related data are presented as the mean  $\pm$  standard error of the mean (SEM). Comparisons between two groups were calculated by two-tailed Student's t-test, and significant differences between multiple groups were evaluated by one-way ANOVA with Tukey's HSD post hoc testing using GraphPad Prism 8 software (GraphPad Software, La Jolla, CA, USA). The test statistics have been transformed into adjusted P values following Tukey multiple comparison testing. Differences were considered statistically significant when the P value was less than 0.05.

### Supplementary references

1. Cherry WB, Yoon J, Bartemes KR, et al. A novel IL-1 family cytokine, IL-33, potently activates human eosinophils. *The Journal of allergy and clinical immunology* 2008;121(6):1484-90.
2. Lee KS, Lee HK, Hayflick JS, et al. Inhibition of phosphoinositide 3-kinase delta attenuates allergic airway inflammation and hyperresponsiveness in murine asthma model. *FASEB J* 2006;20(3):455-65.
3. McMillan SJ, Bishop B, Townsend MJ, et al. The absence of interleukin 9 does not affect the development of allergen-induced pulmonary inflammation nor airway hyperreactivity. *The Journal of experimental medicine* 2002;195(1):51-57.

### Supplementary figure legends

**Supplementary figure 1** FINs triggered the cell death of human eosinophils. (A) Gating strategy used to define the human eosinophil population (Siglec-8<sup>+</sup>/CCR3<sup>+</sup>) in the peripheral blood. Siglec-8<sup>+</sup>/CCR3<sup>+</sup> cells were then sorted for Wright-Giemsa staining. (B) Representative flow cytometry plots of cell viability (x axis: annexin V; y axis: DAPI) at 24 hours for control and FIN-treated (erastin 40  $\mu$ M, RSL3 4  $\mu$ M, ART 200  $\mu$ M) human eosinophils in leukocytes. (C) Peripheral leukocytes from non-asthmatic patients ( $n=3$ ) with increased eosinophils were cultured with various concentrations of FINs for 24 hours prior to viability determination. Siglec-8<sup>+</sup>/CCR3<sup>+</sup>/annexin V/DAPI cells were distinguished as viable peripheral eosinophils. Data are shown as mean  $\pm$  SEM, analysed by one-way ANOVA. FINs, ferroptosis-inducing agents; DAPI, 4',6-diamidino-2-phenylindole; RSL3, Ras-selective lethal small molecule 3; ART, artesunate.

**Supplementary figure 2** Representative flow cytometry plots for control and FIN-treated mouse eosinophils. (A) Representative flow cytometry plots of cell viability (x axis: annexin V; y axis: PI) at 24 hours for control and FIN-treated (erastin 30  $\mu$ M, RSL3 2  $\mu$ M, ART 100  $\mu$ M) mouse eosinophils isolated from the peripheral blood of *Il5* transgenic mice.

(B) Gating strategy used to define the mouse eosinophil population (Siglec-F<sup>+</sup>/CD11c<sup>-</sup>) in BAL cells treated with FINs for 24 hours. (C) Representative flow cytometry plots of cell viability (x axis: annexin V; y axis: DAPI) at 24 hours for control and FIN-treated (erastin 30  $\mu$ M, RSL3 2  $\mu$ M, ART 100  $\mu$ M) mouse BAL eosinophils from allergic mice. FIN, ferroptosis-inducing agent; PI, propidium iodide; RSL3, Ras-selective lethal small molecule 3; ART, artesunate; IL, interleukin; BAL, bronchoalveolar lavage; DAPI, 4',6-diamidino-2-phenylindole.

**Supplementary figure 3** Apoptosis and necroptosis pathways in eosinophils, and the effects of lipid ROS inhibitors in FIN-treated eosinophils and MEFs. Eosinophils were isolated from the peripheral blood of *I15* transgenic mice. Annexin V/PI cells were defined as viable eosinophils. (A) Eosinophils were cultured with staurosporine (20 nM) with or without Z-VAD-FMK (100  $\mu$ M) for 24 hours. (B) Eosinophils were cultured with H<sub>2</sub>O<sub>2</sub> (2 mM) with or without necrostatin-1 (100  $\mu$ M) for 0.5 hours. (C) Transmission electron microscopy of eosinophils treated with DMSO (12 hours), staurosporine (20 nM, 12 hours) and H<sub>2</sub>O<sub>2</sub> (2 mM, 0.25 hours). (D) Lipid ROS production at indicated times (6, 12, and 24 hours) was assessed by flow cytometry using C11-BODIPY in eosinophils. (E) Effect of fer-1 (2  $\mu$ M) on lipid ROS production in eosinophils treated with FINs (erastin 30  $\mu$ M, RSL3 2  $\mu$ M, ART 100  $\mu$ M) for 24 hours. (F) Effects of fer-1 (2  $\mu$ M) and lip-1 (2  $\mu$ M) on the cell viability of MEFs treated with FINs (erastin 2  $\mu$ M, RSL3 1  $\mu$ M, ART 100  $\mu$ M) for 24 hours. (G) Effect of fer-1 on lipid ROS production in MEFs treated with FINs for 12 hours. All data are shown as mean  $\pm$  SEM, analysed by one-way ANOVA. FIN, ferroptosis-inducing agent; MEFs, mouse embryonic

fibroblasts; IL, interleukin; PI, propidium iodide; H<sub>2</sub>O<sub>2</sub>, hydrogen peroxide; DMSO, dimethylsulfoxide; ROS, reactive oxygen species; fer-1, ferrostatin-1; RSL3, Ras-selective lethal small molecule 3; ART, artesunate; lip-1, liproxstatin-1.

**Supplementary figure 4** Ferroptosis induction by FINs in eosinophils did not proceed through mitochondrial ROS. (A and B) Eosinophils isolated from the peripheral blood of *Il5* transgenic mice were cultured with FINs (erastin 30  $\mu$ M, RSL3 2  $\mu$ M, ART 100  $\mu$ M). Mitochondrial ROS production at indicated times (6, 12, and 24 hours) was assessed by flow cytometry using MitoSOX. Representative histograms are shown in (A), and cumulative data expressed relative to the control are represented in (B). (C) Effect of MitoTEMPO (20  $\mu$ M) on the lethality of ART (100  $\mu$ M) treatment for 24 hours in eosinophils. Annexin V/PI cells were defined as viable cells. All data are shown as mean  $\pm$  SEM, analysed by one-way ANOVA. FINs, ferroptosis-inducing agents; ROS, reactive oxygen species; IL, interleukin; RSL3, Ras-selective lethal small molecule 3; ART, artesunate; PI, propidium iodide.

**Supplementary figure 5** FINs attenuated mucus hyperproduction induced by OVA, but had no effect on mouse weight and BAL protein. C57BL/6 mouse administrated with FINs (erastin 25 mg/kg, RSL3 10 mg/kg, ART 20 mg/kg) or vehicle control. (A) Experimental scheme for the FIN treatment *in vivo*. (B and C) Representative images (B) and the semi-quantified scorings (C) of PAS staining in mouse lung sections by FIN treatment. (D and E) Mouse weight (D) and total BALF protein (E) were determined. (F) Gating strategy used to define the mouse eosinophil population (Siglec-F<sup>+</sup>/CD11c<sup>-</sup>) in BAL cells from control

and allergic mice. Data are shown as the mean  $\pm$  SEM of six to eight mice per group, analysed by one-way ANOVA (C) or Student's t-test (D, E). FINs, ferroptosis-inducing agents; OVA, ovalbumin; BAL, bronchoalveolar lavage; PAS, periodic acid-schiff; BALF, bronchoalveolar lavage fluid.

**Supplementary table 1.** Primer Sets for Real-time PCR Analysis

| Genes (mouse) | Forward (5'–3')        | Reverse (5'–3')        |
|---------------|------------------------|------------------------|
| <i>I14</i>    | CCCCAGCTAGTTGTCATCCTG  | CAAGTGATTTTGTGCGCATCCG |
| <i>I113</i>   | CAGCCTCCCCGATACCAAAT   | GCGAAACAGTTGCTTTGTGTAG |
| <i>I125</i>   | TATGAGTTGGACAGGGACTTGA | TGGTAAAGTGGGACGGAGTTG  |
| <i>Actb</i>   | AGAGGGAAATCGTGCGRGAC   | CAATAGTGACCTGGCCGT     |

**Supplementary table 2.** Mean differences, 95% confidence intervals (CI) of difference and adjusted P values for compared groups

| Figures                | Compared groups            | Mean difference | 95% CI of difference | Adjusted P Value |
|------------------------|----------------------------|-----------------|----------------------|------------------|
| Figure 1A              | Erastin (0 vs 60 $\mu$ M)  | 24.13           | 3.085 to 45.18       | 0.0181           |
|                        | Erastin (0 vs 80 $\mu$ M)  | 25.54           | 4.493 to 46.58       | 0.0112           |
|                        | Erastin (0 vs 100 $\mu$ M) | 37.74           | 16.70 to 58.79       | 0.0001           |
|                        | RSL3 (0 vs 4 $\mu$ M)      | 49.46           | 14.81 to 84.11       | 0.004            |
|                        | RSL3 (0 vs 6 $\mu$ M)      | 70.6            | 35.94 to 105.3       | 0.0001           |
|                        | RSL3 (0 vs 8 $\mu$ M)      | 81.44           | 46.78 to 116.1       | <0.0001          |
|                        | ART (0 vs 100 $\mu$ M)     | 20.48           | 0.3519 to 40.60      | 0.0447           |
| ART (0 vs 200 $\mu$ M) | 55.62                      | 35.50 to 75.74  | <0.0001              |                  |

|           |                            |        |                  |         |
|-----------|----------------------------|--------|------------------|---------|
|           | ART (0 vs 400 $\mu$ M)     | 79.7   | 59.57 to 99.82   | <0.0001 |
| Figure 1B | Erastin (0 vs 100 $\mu$ M) | 31.59  | 18.73 to 44.45   | 0.001   |
|           | RSL3 (0 vs 6 $\mu$ M)      | 76.8   | 69.60 to 83.99   | <0.0001 |
|           | ART (0 vs 200 $\mu$ M)     | 40.12  | 17.31 to 62.93   | 0.0051  |
| Figure 1C | Erastin (0 vs 20 $\mu$ M)  | 40.12  | 35.71 to 44.53   | <0.0001 |
|           | Erastin (0 vs 30 $\mu$ M)  | 72.4   | 67.99 to 76.81   | <0.0001 |
|           | Erastin (0 vs 40 $\mu$ M)  | 92.41  | 88.00 to 96.82   | <0.0001 |
|           | RSL3 (0 vs 2 $\mu$ M)      | 62.39  | 47.09 to 77.69   | <0.0001 |
|           | RSL3 (0 vs 4 $\mu$ M)      | 80.52  | 65.23 to 95.82   | <0.0001 |
|           | RSL3 (0 vs 6 $\mu$ M)      | 98.3   | 83.00 to 113.6   | <0.0001 |
|           | ART (0 vs 50 $\mu$ M)      | 40.1   | 35.48 to 44.72   | <0.0001 |
|           | ART (0 vs 100 $\mu$ M)     | 63.95  | 59.33 to 68.56   | <0.0001 |
|           | ART (0 vs 200 $\mu$ M)     | 92.84  | 88.22 to 97.45   | <0.0001 |
| Figure 1D | Erastin (0 vs 12 hr)       | 14.92  | 13.43 to 16.42   | <0.0001 |
|           | Erastin (0 vs 24 hr)       | 59.7   | 58.20 to 61.19   | <0.0001 |
|           | RSL3 (0 vs 12 hr)          | 25.84  | 3.060 to 48.61   | 0.0274  |
|           | RSL3 (0 vs 24 hr)          | 74.85  | 52.07 to 97.63   | <0.0001 |
|           | ART (0 vs 12 hr)           | 5.637  | 1.113 to 10.16   | 0.0169  |
|           | ART (0 vs 24 hr)           | 69.82  | 65.30 to 74.35   | <0.0001 |
| Figure 1E | Erastin (0 vs 20 $\mu$ M)  | 30.73  | 23.82 to 37.64   | <0.0001 |
|           | Erastin (0 vs 30 $\mu$ M)  | 30.3   | 23.39 to 37.21   | <0.0001 |
|           | Erastin (0 vs 40 $\mu$ M)  | 39.03  | 32.13 to 45.94   | <0.0001 |
|           | RSL3 (0 vs 2 $\mu$ M)      | 50.08  | 42.54 to 57.63   | <0.0001 |
|           | RSL3 (0 vs 4 $\mu$ M)      | 83.27  | 75.73 to 90.81   | <0.0001 |
|           | RSL3 (0 vs 6 $\mu$ M)      | 88.48  | 80.94 to 96.02   | <0.0001 |
|           | ART (0 vs 50 $\mu$ M)      | 33.72  | 26.86 to 40.57   | <0.0001 |
|           | ART (0 vs 100 $\mu$ M)     | 48.16  | 41.31 to 55.01   | <0.0001 |
|           | ART (0 vs 200 $\mu$ M)     | 63.5   | 56.65 to 70.35   | <0.0001 |
| Figure 2C | ART (DMSO vs Spautin-1)    | -21.05 | -29.75 to -12.35 | 0.0003  |
| Figure 2G | Erastin (CTL vs DFO)       | -18.55 | -19.91 to -17.18 | <0.0001 |
|           | RSL3 (CTL vs DFO)          | -40.72 | -47.54 to -33.90 | <0.0001 |
|           | ART (CTL vs DFO)           | -55.36 | -56.79 to -53.94 | <0.0001 |
| Figure 2H | Erastin (CTL vs CPX)       | -17.93 | -34.61 to -1.250 | 0.0357  |
|           | RSL3 (CTL vs CPX)          | -39.75 | -51.89 to -27.62 | <0.0001 |
|           | ART (CTL vs CPX)           | -48.82 | -66.89 to -30.75 | 0.0001  |
| Figure 2I | Erastin (CTL vs Fe(II))    | 27.08  | 20.04 to 34.13   | <0.0001 |
|           | RSL3 (CTL vs Fe(II))       | 19.84  | 0.8208 to 38.85  | 0.0412  |



|           |                         |         |                   |         |
|-----------|-------------------------|---------|-------------------|---------|
|           | ART (CTL vs Fe(II))     | 28.39   | 18.51 to 38.27    | <0.0001 |
| Figure 3B | Erastin (0 vs 24 hr)    | -6.242  | -7.242 to -5.243  | <0.0001 |
|           | RSL3 (0 vs 24 hr)       | -0.8781 | -1.071 to -0.6849 | <0.0001 |
|           | ART (0 vs 24 hr)        | -2.992  | -3.910 to -2.074  | <0.0001 |
| Figure 3C | Erastin (CTL vs NAC)    | -23.77  | -40.46 to -7.081  | 0.008   |
|           | RSL3 (CTL vs NAC)       | -66.26  | -74.52 to -58.01  | <0.0001 |
|           | ART (CTL vs NAC)        | -35.2   | -42.46 to -27.94  | <0.0001 |
| Figure 3D | Erastin (CTL vs GSH)    | -32.73  | -45.41 to -20.06  | 0.0002  |
|           | RSL3 (CTL vs GSH)       | -59.58  | -67.01 to -52.16  | <0.0001 |
|           | ART (CTL vs GSH)        | -27.97  | -45.20 to -10.75  | 0.0036  |
| Figure 3E | Erastin (CTL vs NAC)    | 3.944   | 3.079 to 4.809    | <0.0001 |
|           | Erastin (CTL vs GSH)    | 3.357   | 2.491 to 4.224    | <0.0001 |
|           | RSL3 (CTL vs NAC)       | 1.249   | 0.9535 to 1.544   | <0.0001 |
|           | RSL3 (CTL vs GSH)       | 1.066   | 0.7124 to 1.420   | <0.0001 |
|           | ART (CTL vs NAC)        | 1.841   | 0.7965 to 2.886   | 0.0022  |
|           | ART (CTL vs GSH)        | 1.622   | 0.5518 to 2.692   | 0.0055  |
| Figure 4A | Erastin (0 vs 12 hr)    | 1.068   | 0.8100 to 1.325   | <0.0001 |
| Figure 4C | ART (0 vs 6 hr)         | 0.1557  | 0.02634 to 0.2851 | 0.0179  |
|           | ART (0 vs 12 hr)        | 0.2648  | 0.1355 to 0.3942  | 0.0002  |
| Figure 4D | Erastin vs Erastin+RSL3 | 42.86   | 29.72 to 56.01    | <0.0001 |
|           | Erastin vs Erastin+ART  | 43.44   | 30.29 to 56.58    | <0.0001 |
|           | RSL3 vs Erastin+RSL3    | 27.35   | 14.21 to 40.50    | <0.0001 |
|           | RSL3 vs RSL3+ART        | 25.21   | 12.06 to 38.35    | 0.0002  |
|           | ART vs Erastin+ART      | 44.03   | 30.88 to 57.17    | <0.0001 |
|           | ART vs RSL3+ART         | 41.31   | 28.16 to 54.45    | <0.0001 |
| Figure 5A | DMSO (CTL vs OVA)       | -26.63  | -35.71 to -17.54  | <0.0001 |
|           | OVA (DMSO vs Erastin)   | 11      | 2.589 to 19.41    | 0.0047  |
|           | OVA (DMSO vs RSL3)      | 16.13   | 7.040 to 25.21    | <0.0001 |
|           | NS (CTL vs OVA)         | -24.33  | -33.18 to -15.48  | <0.0001 |
|           | OVA (NS vs ART)         | 14.83   | 5.983 to 23.68    | 0.0007  |
| Figure 5B | DMSO (CTL vs OVA)       | -49.88  | -68.09 to -31.67  | <0.0001 |
|           | OVA (DMSO vs Erastin)   | 23.87   | 7.013 to 40.73    | 0.0019  |
|           | OVA (DMSO vs RSL3)      | 32.61   | 14.40 to 50.82    | <0.0001 |
|           | NS (CTL vs OVA)         | -38.36  | -52.96 to -23.77  | <0.0001 |
|           | OVA (NS vs ART)         | 22.85   | 8.257 to 37.44    | 0.0015  |
| Figure 5C | DMSO (CTL vs OVA)       | -16.85  | -25.22 to -8.478  | <0.0001 |
|           | OVA (DMSO vs Erastin)   | 10.92   | 3.168 to 18.67    | 0.002   |

|                     |                              |        |                   |         |
|---------------------|------------------------------|--------|-------------------|---------|
|                     | OVA (DMSO vs RSL3)           | 14.01  | 5.643 to 22.38    | 0.0002  |
|                     | NS (CTL vs OVA)              | -11.77 | -16.69 to -6.862  | <0.0001 |
|                     | OVA (NS vs ART)              | 8.542  | 3.630 to 13.45    | 0.0005  |
| Figure 5E           | DMSO (CTL vs OVA)            | -2.625 | -3.378 to -1.872  | <0.0001 |
|                     | OVA (DMSO vs Erastin)        | 1.25   | 0.5531 to 1.947   | <0.0001 |
|                     | OVA (DMSO vs RSL3)           | 1.125  | 0.3723 to 1.878   | 0.001   |
|                     | NS (CTL vs OVA)              | -2.833 | -3.571 to -2.096  | <0.0001 |
|                     | OVA (NS vs ART)              | 1.167  | 0.4291 to 1.904   | 0.0014  |
| Figure 5F<br>(III3) | DMSO (CTL vs OVA)            | -2.691 | -4.011 to -1.371  | <0.0001 |
|                     | OVA (DMSO vs Erastin)        | 2.114  | 0.8921 to 3.336   | 0.0001  |
|                     | OVA (DMSO vs RSL3)           | 2.398  | 1.078 to 3.718    | <0.0001 |
|                     | NS (CTL vs OVA)              | -1.387 | -2.316 to -0.4572 | 0.0024  |
|                     | OVA (NS vs ART)              | 1.423  | 0.4931 to 2.352   | 0.0019  |
| Figure 5F<br>(II25) | DMSO (CTL vs OVA)            | -2.406 | -4.033 to -0.7781 | 0.0011  |
|                     | OVA (DMSO vs Erastin)        | 2.277  | 0.7702 to 3.784   | 0.0008  |
|                     | OVA (DMSO vs RSL3)           | 2.632  | 1.005 to 4.260    | 0.0003  |
|                     | NS (CTL vs OVA)              | -3.514 | -6.014 to -1.013  | 0.0042  |
|                     | OVA (NS vs ART)              | 3.614  | 1.113 to 6.115    | 0.0033  |
| Figure 5G           | OVA (DMSO vs Erastin)        | 19.11  | 11.67 to 26.55    | <0.0001 |
|                     | OVA (DMSO vs RSL3)           | 22.59  | 11.51 to 33.67    | 0.0008  |
|                     | OVA (NS vs ART)              | 10.36  | 5.833 to 14.88    | 0.0005  |
| Figure 5H           | OVA (DMSO vs Erastin)        | 11.13  | 3.742 to 18.51    | 0.006   |
|                     | OVA (DMSO vs RSL3)           | 13.27  | 4.951 to 21.6     | 0.0046  |
|                     | OVA (NS vs ART)              | 7.22   | 2.996 to 11.45    | 0.0034  |
| Figure 6A           | DXMS (0 vs 1.2 mM)           | 92.1   | 87.42 to 96.78    | <0.0001 |
|                     | DXMS (0 vs 1.6 mM)           | 98.86  | 94.19 to 103.5    | <0.0001 |
| Figure 6B           | DXMS (CTL vs Z-VAD-FMK)      | -27.43 | -35.47 to -19.38  | <0.0001 |
| Figure 6D           | DXMS vs Erastin+DXMS         | 81.24  | 76.69 to 85.79    | <0.0001 |
|                     | Erastin vs Erastin+DXMS      | 80.27  | 75.72 to 84.82    | <0.0001 |
| Figure 6E           | DXMS vs RSL3+DXMS            | 94.41  | 82.21 to 106.6    | <0.0001 |
|                     | RSL3 vs RSL3+DXMS            | 71.48  | 59.28 to 83.67    | <0.0001 |
| Figure 6F           | DXMS vs ART+DXMS             | 78.86  | 73.60 to 84.12    | <0.0001 |
|                     | ART vs ART+DXMS              | 50.92  | 45.66 to 56.18    | <0.0001 |
| Figure 6G           | NS (CTL vs OVA)              | -74.45 | -87.45 to -61.45  | <0.0001 |
|                     | OVA (NS vs ART 10+DXMS 0.25) | 54.36  | 41.12 to 67.59    | <0.0001 |
|                     | OVA (NS vs DXMS 0.5)         | 57.79  | 40.7 to 74.87     | <0.0001 |
|                     | OVA (ART 10 vs ART 10+DXMS)  | 22.4   | 8.631 to 36.18    | 0.0003  |

|                            |                                                      |        |                   |         |
|----------------------------|------------------------------------------------------|--------|-------------------|---------|
|                            | 0.25)                                                |        |                   |         |
|                            | OVA (DXMS 0.25 vs ART 10+DXMS 0.25)                  | 16.64  | 3.41 to 29.88     | 0.0073  |
| Figure 6H                  | NS (CTL vs OVA)                                      | -70.66 | -88.03 to -53.30  | <0.0001 |
|                            | OVA (NS vs ART 10+DXMS 0.25)                         | 53.72  | 36.04 to 71.4     | <0.0001 |
|                            | OVA (NS vs DXMS 0.5)                                 | 42.44  | 19.62 to 65.27    | <0.0001 |
|                            | OVA (ART 10 vs ART 10+DXMS 0.25)                     | 33.65  | 15.25 to 52.05    | <0.0001 |
|                            | OVA (DXMS 0.25 vs ART 10+DXMS 0.25)                  | 17.6   | -0.08248 to 35.27 | 0.0516  |
| Figure 6I                  | NS (CTL vs OVA)                                      | -60.17 | -72.23 to -48.10  | <0.0001 |
|                            | OVA (NS vs ART 10+DXMS 0.25)                         | 54.67  | 42.39 to 66.96    | <0.0001 |
|                            | OVA (NS vs DXMS 0.5)                                 | 52.53  | 36.67 to 68.38    | <0.0001 |
|                            | OVA (ART 10 vs ART 10+DXMS 0.25)                     | 19.95  | 7.165 to 32.73    | 0.0005  |
|                            | OVA (DXMS 0.25 vs ART 10+DXMS 0.25)                  | 10.38  | -1.898 to 22.66   | 0.1338  |
| Figure 6J<br>(II4)         | NS (CTL vs OVA)                                      | -1.814 | -2.837 to -0.7914 | 0.0001  |
|                            | OVA (NS vs ART 10+DXMS 0.25)                         | 1.876  | 0.8346 to 2.917   | <0.0001 |
|                            | OVA (NS vs DXMS 0.5)                                 | 2.203  | 0.8589 to 3.547   | 0.0003  |
|                            | OVA (ART 10 vs ART 10+DXMS 0.25)                     | 0.9433 | -0.1402 to 2.027  | 0.1149  |
|                            | OVA (DXMS 0.25 vs ART 10+DXMS 0.25)                  | 1.191  | 0.1501 to 2.232   | 0.0177  |
| Figure 6J<br>(III3)        | NS (CTL vs OVA)                                      | -3.084 | -4.865 to -1.303  | 0.0001  |
|                            | OVA (NS vs ART 10+DXMS 0.25)                         | 2.853  | 1.04 to 4.667     | 0.0005  |
|                            | OVA (NS vs DXMS 0.5)                                 | 3.096  | 0.7547 to 5.437   | 0.0043  |
|                            | OVA (ART 10 vs ART 10+DXMS 0.25)                     | 1.78   | -0.1072 to 3.667  | 0.073   |
|                            | OVA (DXMS 0.25 vs ART 10+DXMS 0.25)                  | 1.767  | -0.04583 to 3.581 | 0.0593  |
| Supplementary<br>figure 1C | RSL3 (0 vs 6 $\mu$ M)                                | 90.98  | 43.66 to 138.3    | 0.0006  |
|                            | RSL3 (0 vs 8 $\mu$ M)                                | 93.79  | 46.47 to 141.1    | 0.0005  |
|                            | ART (0 vs 200 $\mu$ M)                               | 60.85  | 2.641 to 119.1    | 0.0404  |
|                            | ART (0 vs 400 $\mu$ M)                               | 63.64  | 5.434 to 121.8    | 0.0322  |
| Supplementary<br>figure 3A | Staurosporine (CTL vs Z-VAD-FMK)                     | -34.17 | -42.09 to -26.25  | <0.0001 |
| Supplementary              | H <sub>2</sub> O <sub>2</sub> (CTL vs Necrostatin-1) | -42.45 | -49.63 to -35.27  | <0.0001 |

|                         |                        |        |                  |         |
|-------------------------|------------------------|--------|------------------|---------|
| figure 3B               |                        |        |                  |         |
| Supplementary figure 3E | Erastin (CTL vs Fer-1) | 1.851  | 0.4915 to 3.211  | 0.0104  |
|                         | RSL3 (CTL vs Fer-1)    | 2.489  | 0.3137 to 4.665  | 0.0263  |
|                         | ART (CTL vs Fer-1)     | 3.63   | 1.618 to 5.641   | 0.0019  |
| Supplementary figure 3F | Erastin (CTL vs Fer-1) | -64.56 | -78.85 to -50.28 | <0.0001 |
|                         | Erastin (CTL vs Lip-1) | -66.11 | -80.39 to -51.83 | <0.0001 |
|                         | RSL3 (CTL vs Fer-1)    | -72.59 | -91.76 to -53.41 | <0.0001 |
|                         | RSL3 (CTL vs Lip-1)    | -74.65 | -93.83 to -55.48 | <0.0001 |
|                         | ART (CTL vs Fer-1)     | -54.11 | -64.31 to -43.90 | <0.0001 |
|                         | ART (CTL vs Lip-1)     | -48.44 | -58.64 to -38.24 | <0.0001 |
| Supplementary figure 3G | Erastin (CTL vs Fer-1) | 2.076  | 1.417 to 2.736   | <0.0001 |
|                         | RSL3 (CTL vs Fer-1)    | 1.884  | 1.584 to 2.184   | <0.0001 |
|                         | ART (CTL vs Fer-1)     | 2.656  | 2.198 to 3.115   | <0.0001 |
| Supplementary figure 4B | ART (0 vs 24 hr)       | -1.761 | -1.942 to -1.581 | <0.0001 |
| Supplementary figure 5C | DMSO (CTL vs OVA)      | -2.75  | -3.447 to -2.053 | <0.0001 |
|                         | OVA (DMSO vs Erastin)  | 1.375  | 0.7301 to 2.020  | <0.0001 |
|                         | OVA (DMSO vs RSL3)     | 1.917  | 1.220 to 2.613   | <0.0001 |
|                         | NS (CTL vs OVA)        | -2.333 | -3.523 to -1.144 | 0.0001  |
|                         | OVA (NS vs ART)        | 1.833  | 0.6440 to 3.023  | 0.0018  |
