# Supplementary material
Source: HighWire-hosted journal article supplement (https://thorax.bmj.com/content/75/11/918)

**A**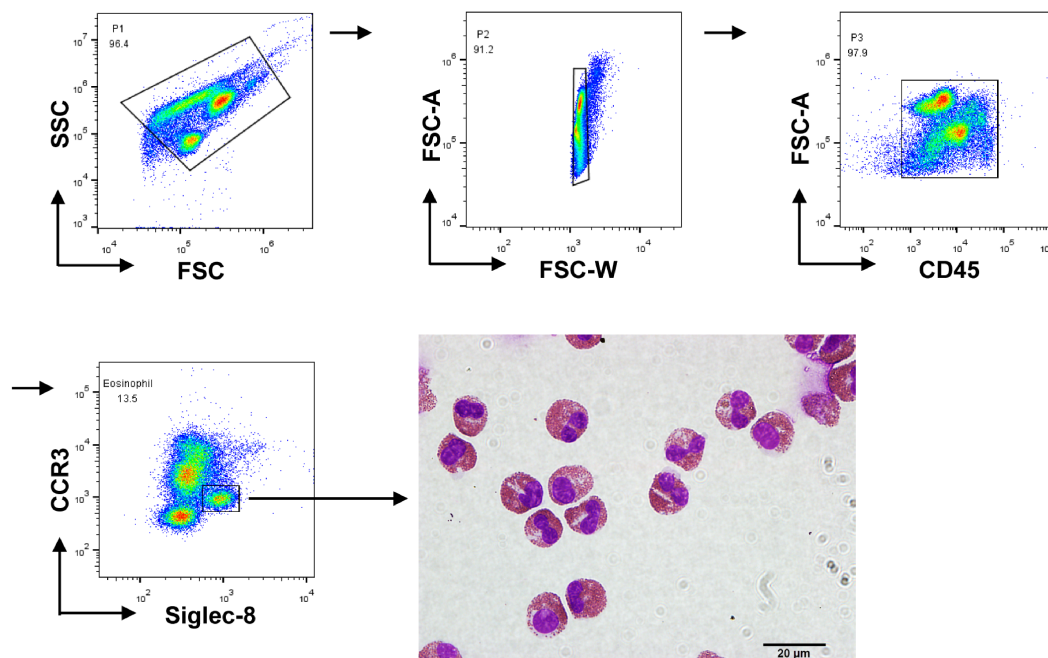**B**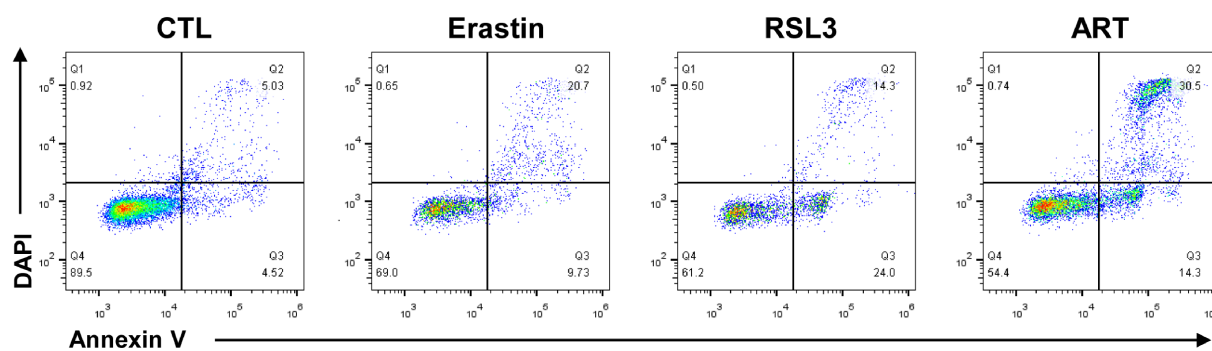**C**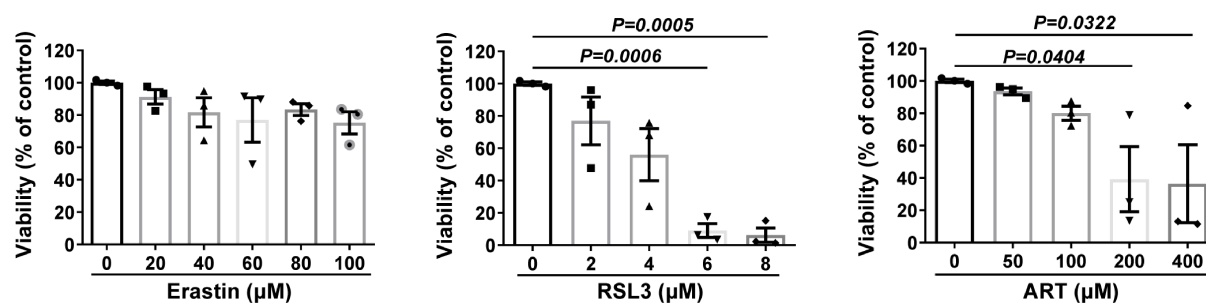

Supplement: inline-supplementary-material-2 [file inline-supplementary-material-2.pdf]

**A**

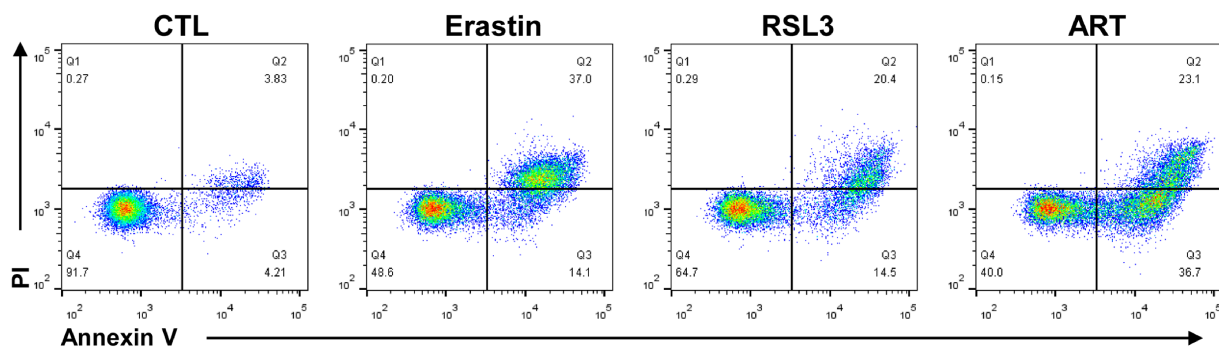

**B**

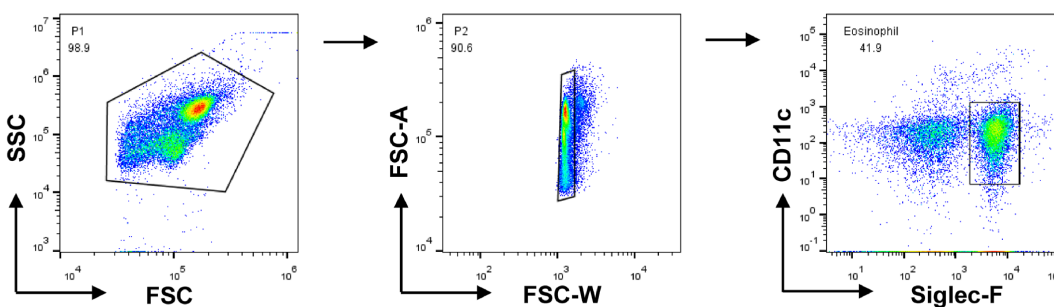

**C**

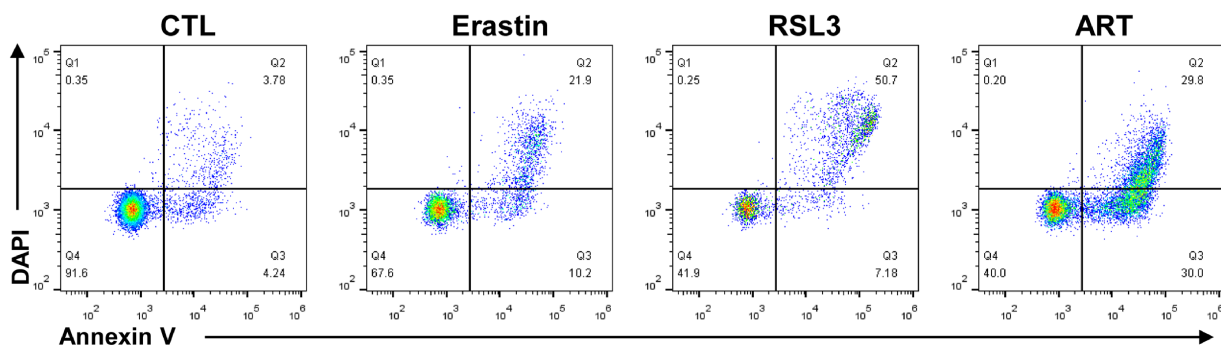

Supplement: inline-supplementary-material-3 [file inline-supplementary-material-3.pdf]

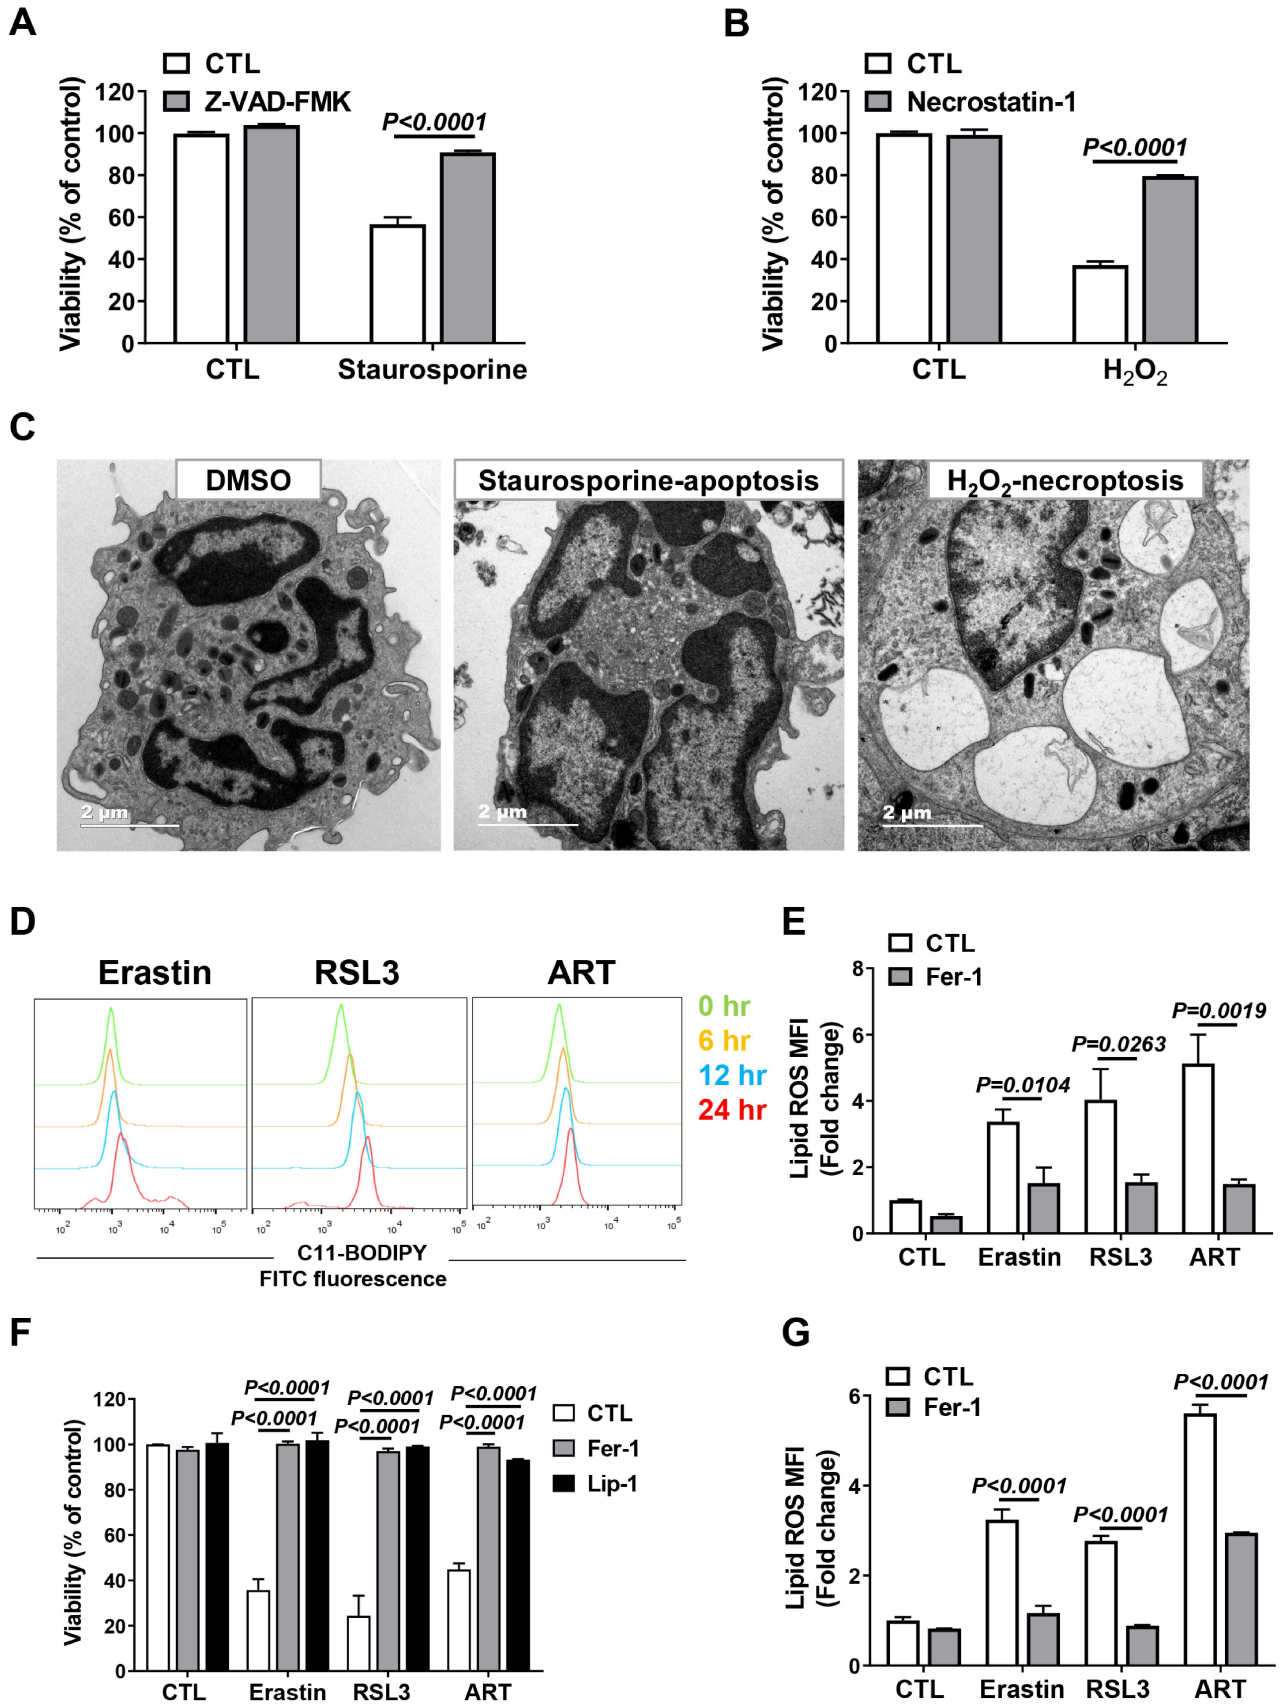

Supplement: inline-supplementary-material-4 [file inline-supplementary-material-4.pdf]

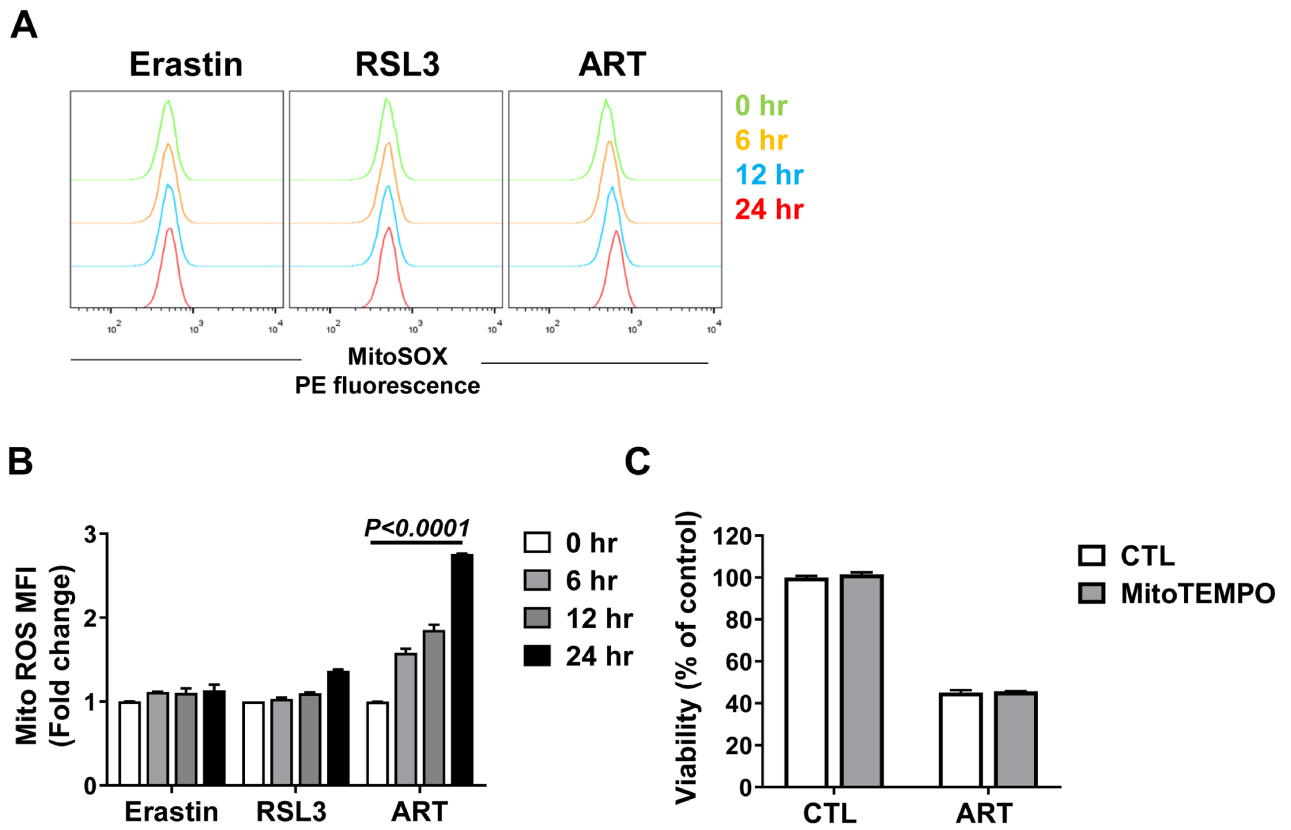

Supplement: inline-supplementary-material-5 [file inline-supplementary-material-5.pdf]

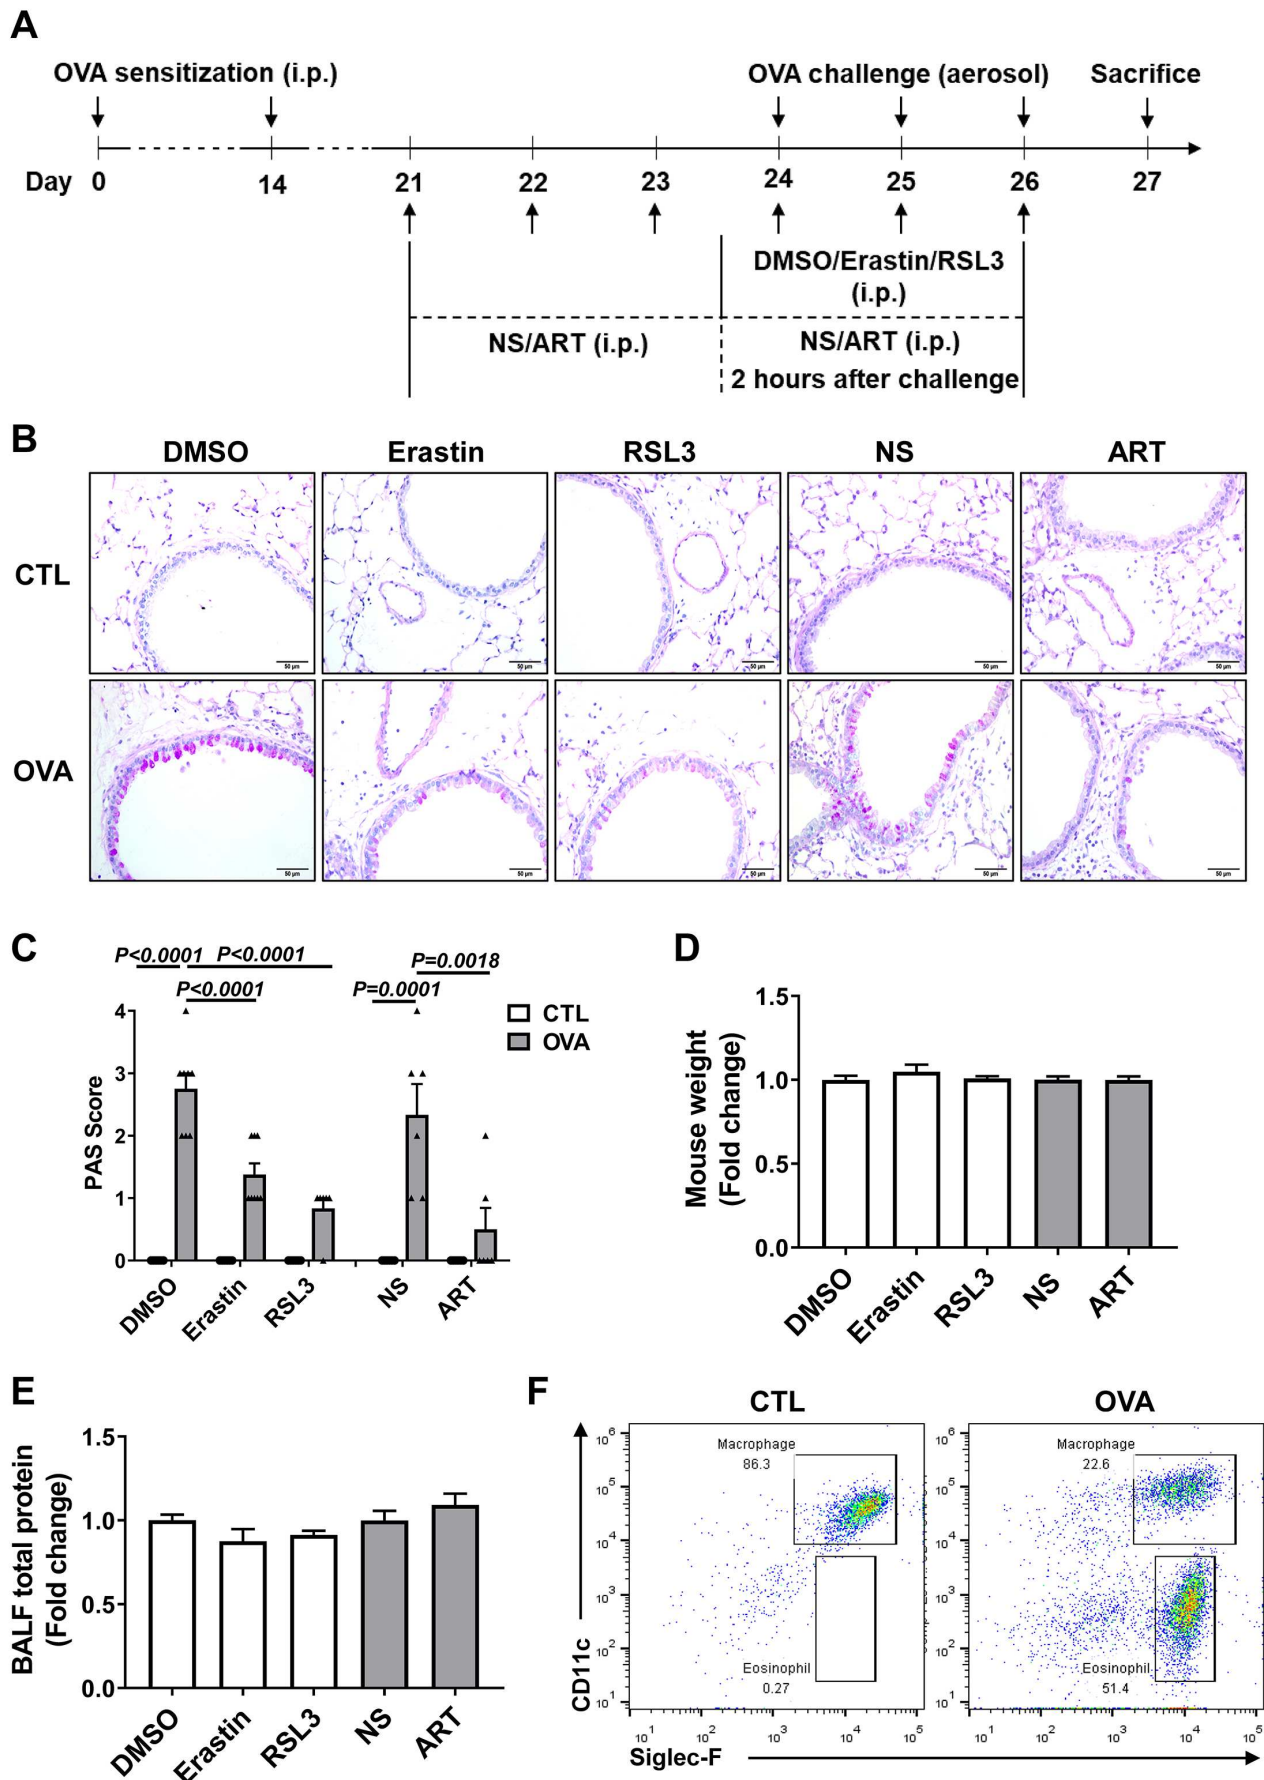

Supplement: inline-supplementary-material-6 [file inline-supplementary-material-6.pdf]
